1 **NLRP3 inflammasome is dispensable in methicillin resistant *Staphylococcus aureus***  
2 **urinary tract infection**

3 **Running title:** The role of NLRP3 inflammasome in MRSA-UTI

4 Santosh Paudel<sup>1</sup>, Kenneth A Rogers<sup>2</sup>, Rahul Kumar<sup>3</sup>, Yogesh Saini<sup>3</sup>, Sonika Patial<sup>3</sup>, Ritwij  
5 Kulkarni<sup>1</sup>

6 <sup>1</sup>Department of Biology, University of Louisiana at Lafayette, Lafayette, LA, 70504

7 <sup>2</sup>New Iberia Research Center, University of Louisiana at Lafayette, Lafayette, LA, 70560

8 <sup>3</sup>Department of comparative biomedical sciences, Louisiana State University, Baton Rouge,  
9 LA

10 **Abstract**

11 NLRP3 inflammasome is a cytoplasmic complex that senses molecular patterns from  
12 pathogens or damaged cells to trigger an innate immune defense response marked by the  
13 production of proinflammatory cytokines IL-1 $\beta$  and IL-18 and an inflammatory death called  
14 pyroptosis. The NLRP3 inflammasome is activated in the urinary tract by a variety of  
15 infectious and non-infectious insults. In this study, we investigated the role of NLRP3  
16 inflammasome by inducing methicillin resistant *Staphylococcus aureus* (MRSA) ascending  
17 UTI in WT and *Nlrp3*<sup>-/-</sup> mice. At 24 and 72 hpi, compared to the WT, the MRSA-infected  
18 *Nlrp3*<sup>-/-</sup> showed ~100-fold lower median CFUs, although this reduction was not statistically  
19 significant. The ablation of NLRP3 did not affect MRSA-induced urinary immune defenses  
20 as indicated by the similar levels of pro-inflammatory cytokines and chemokines and the  
21 similar numbers of granulocytes in the bladder and the kidneys of WT and *Nlrp3*<sup>-/-</sup> mice at 24  
22 h after MRSA infection. However, MRSA-infected *Nlrp3*<sup>-/-</sup> bladders, but not kidneys,  
23 showed significantly higher monocyte infiltration. The histopathological analysis of bladder  
24 and kidney sections showed similar inflammation in MRSA-infected *Nlrp3*<sup>-/-</sup> and WT mice.  
25 Overall, these results suggest that MRSA-induced urinary NLRP3 activity is dispensable to  
26 the host.

27 **Importance**

28 Indwelling urinary catheter usage increased susceptibility to methicillin-resistant  
29 *Staphylococcus aureus* (MRSA) urinary tract infections (UTI) which can be difficult to treat  
30 and can result in potentially fatal complications such as bacteremia, urosepsis, and shock. In  
31 this work, we examined the role of NLRP3 inflammasome in MRSA uropathogenesis. In  
32 comparison to the WT, mice deficient in NLRP3 activity showed similar MRSA burden and  
33 similar inflammation in the bladder and kidney tissues at 24 h after the experimental  
34 induction of ascending UTI. These results suggest that NLRP3 inflammasome is not involved  
35 in shaping urinary immune defenses during acute MRSA-UTI.

36

37 **Introduction**

38 *Staphylococcus aureus* is an atypical cause of asymptomatic bacteriuria and complicated  
39 urinary tract infections (UTI) primarily affecting the individuals with indwelling urinary  
40 catheters, the elderly, and the hospitalized (1-7). The urinary colonization by *S. aureus* is a  
41 major clinical concern because it can lead to life-threatening invasive infections such as  
42 bacteremia, urosepsis, and shock (6, 8-10) and because of the increased prevalence of  
43 methicillin resistant *Staphylococcus aureus* (MRSA) in urine specimens in the last two  
44 decades (6, 10, 11). Previous reports have described specific host-pathogen effectors crucial  
45 for MRSA urinary survival and persistence. For example, MRSA infection was reported to  
46 augment the catheter implant-mediated localized pro-inflammatory cytokine response and  
47 fibrinogen release in the mouse urinary bladder (12). We have reported that *in vitro* exposure  
48 to human urine for 2 h increases MRSA virulence and induces metabolic changes necessary  
49 for survival in the nutrient-limiting urinary tract (13). However, the role of NLRP3 (NOD  
50 (nucleotide oligomerization domain) LRR (leucin-rich repeat) containing receptor, pyrin  
51 domain containing protein 3) inflammasome activity in MRSA uropathogenesis has not been  
52 determined.

53 In response to a variety of bacterial molecular patterns, the NLRP3 forms a cytoplasmic  
54 inflammasome complex with ASC (apoptosis-associated speck-like protein containing  
55 CARD) adaptor, and caspase-1, which cleaves pro-IL-1 $\beta$  and pro-IL-18 into active IL-1 $\beta$  and  
56 IL-18 and activates pro-inflammatory programmed cell death called pyroptosis via cleavage  
57 of gasdermin D (14). Uropathogenic *Escherichia coli* (UPEC)  $\alpha$ -hemolysin has been  
58 reported to activate NLRP3-IL1 $\beta$  signaling axis and pyroptosis in macrophages, neutrophils,  
59 renal fibroblasts, and bladder epithelial cells (15-21). Being partly responsible for the

60 exfoliation of bladder epithelium and subsequent elimination of adherent and intracellular  
61 UPEC, the NLRP3-pyroptosis is an effective immune defense against acute cystitis (15, 22).  
62 In contrast to this protective role during acute cystitis, however the NLRP3 activity can also  
63 promote chronic UPEC-UTI as the exfoliation exposes the underlying epithelium for UPEC  
64 (23). In the case of MRSA, the toxins Panton-Valentine leukocidin (PVL), leukocidin AB  
65 (LukAB), and  $\alpha$ -hemolysin (Hla) have been reported to trigger NLRP3 inflammasome in  
66 myelocytes (24-27). The impact of NLRP3 activity on the outcomes of *S. aureus* infection,  
67 however are reported to be dependent on the site of infection. For example, *S. aureus*-  
68 induced NLRP3-IL1 $\beta$  signaling axis has been found to be protective during skin and soft  
69 tissue infection (28), and detrimental for the host during severe *S. aureus* pneumonia (24). In  
70 contrast, NLRP3 protein is not required for the survival in acute central nervous system *S.*  
71 *aureus* infection because in this model AIM2 (absent in melanoma 2) has been reported to  
72 replace NLRP3 in the IL-1 $\beta$  processing inflammasome complex (29). The role of NLRP3 in  
73 MRSA uropathogenesis has not been deciphered.

74 We hypothesized a protective role for the NLRP3 inflammasome activity in MRSA acute  
75 cystitis. To address this hypothesis, we experimentally induced ascending UTI by inoculating  
76 MRSA into the urinary bladders of 8-10 weeks old, female WT and *Nlrp3*<sup>-/-</sup> mice. We  
77 observed lower MRSA CFUs in the bladder and the kidneys of *Nlrp3*<sup>-/-</sup> mice at 24 and 72 hpi  
78 compared to the WT, although this reduction was not statistically significant. The WT and  
79 *Nlrp3*<sup>-/-</sup> mouse cohorts with MRSA ascending UTI also showed similar levels of pro-  
80 inflammatory cytokines (measured by ELISA) and granulocyte infiltration (flow cytometry  
81 and histopathology) in the bladder and kidney tissues, although MRSA-infected *Nlrp3*<sup>-/-</sup>  
82 bladders showed significantly higher monocyte recruitment compared to their WT

83 counterparts. The treatment of WT mice with NLRP3 inhibitor, MCC950 at 4 h after MRSA  
84 infection resulted in a modest but statistically significant reduction in the bladder burden at  
85 24 hpi compared to the vehicle-treated controls. In summary, the activation of NLRP3  
86 inflammasome appears to be dispensable during MRSA acute UTI with the caveat that our  
87 experiments do not examine the effects of MRSA-induced urinary NLRP3 activity on the  
88 exfoliation of uroepithelium or on the outcomes of MRSA chronic UTI.

## 89 **Materials and Methods**

### 90 **Bacteria, mice, and the reagents**

91 Uropathogenic MRSA strain, MRSA1369 was grown overnight at 37°C and 200 rpm shaking  
92 in tryptic soy broth (TSB). The bacteria from the overnight culture were diluted 1:10 in fresh  
93 TSB, incubated at 37°C, 200 rpm shaking to a mid-log phase ( $OD_{600} = 0.6$ ). To prepare  
94 inoculum for the mouse infection, mid-log phase MRSA 1369 culture was washed once in  
95 sterile D-PBS (Dulbecco's phosphate buffered saline) and adjusted to  $10^9$  CFU (colony  
96 forming unit)/ml. *Nlrp3*<sup>-/-</sup> mice (Stock #021302) were purchased from The Jackson  
97 Laboratory (30). NLRP3 inhibitor MCC950 was purchased from InvivoGen and resuspended  
98 in DMSO vehicle before administration at the desired concentration. Other reagents were  
99 purchased from Fisher Scientific.

### 100 **Mouse model of ascending UTI with and without a catheter implant**

101 C57BL6 WT and *Nlrp3*<sup>-/-</sup> breeding trios from the Jackson Laboratory were housed at the  
102 biology department mouse facility located at University of Louisiana at Lafayette. To  
103 normalize individual gut microbiota of WT and *Nlrp3*<sup>-/-</sup> mice and to minimize cage  
104 differences, we used bedding transfer where the soiled bedding from the cages containing  
105 WT and *Nlrp3*<sup>-/-</sup> mice was mixed and distributed equally over a period of three weeks, from

106 weaning till the experimental induction of ascending UTI (31). As approved by the  
107 Institutional Animal Care and Use Committee (IACUC) at UL Lafayette (2018-8717-011),  
108 we administered via transurethral catheterization 50  $\mu$ l MRSA 1369 (equivalent to  $5 \times 10^7$   
109 CFU) into the urinary bladders of anesthetized, 8-10 weeks-old female WT and *Nlrp3*<sup>-/-</sup> mice  
110 (32). For the mouse model of catheter-associated UTI (CAUTI), MRSA 1369 inoculum was  
111 administered immediately after implanting a 4- to 5-mm piece of silicone catheter (12). Mice  
112 were sacrificed at 6, 24, and 72 hours post infection (hpi). The bladder, kidney, and spleen  
113 were dilution plated on CHROMagar™ or TS agar to determine organ-specific MRSA  
114 burden. Tissue samples were also processed for ELISA, flow cytometry, or histopathology as  
115 described elsewhere.

#### 116 **MCC950 treatment**

117 In separate experiments, at 4 h after induction of ascending UTI, one group of MRSA 1369-  
118 infected WT littermates were intraperitoneally injected with 10mg/kg MCC950 while the  
119 control group was injected with DMSO vehicle. Mice were sacrificed 24 hpi and MRSA  
120 burden in the bladder, the kidneys, and the spleen was determined by dilution plating tissue  
121 homogenates on CHROMagar™ or TS agar plates.

#### 122 **Cytokine profiling by ELISA**

123 The bladder and kidney homogenates in sterile D-PBS were filtered through 0.65  $\mu$ m  
124 Ultrafree®-MC Centrifugal Filter (Millipore sigma) and the total protein concentration was  
125 estimated using Pierce BCA protein assay kit (Thermo-scientific). The levels of cytokines  
126 IL-1 $\beta$ , IL-6, IL-10, IL-17A, TNF- $\alpha$ , CXCL1 (KC), CCL2 (MCP-1), CCL3 (MIP1 $\alpha$ ), CCL5  
127 (RANTES), and IFN- $\gamma$ , in the tissues homogenates were estimated using MILLIPLEX®  
128 Mouse Cytokine/Chemokine Magnetic Bead Panel (MCYTOMAG-70K-10C). Each cytokine

129 in an individual mouse tissue was presented as a scattered diagram showing the amount of  
130 cytokine/g of total protein with median as the central tendency.

### 131 **Immune cell infiltration in the bladder and the kidney tissues**

132 Specific immune cells infiltrating the bladder and the kidneys of WT and *Nlrp3*<sup>-/-</sup> mice were  
133 identified using a panel of fluorescent-labelled antibodies for flow cytometry (Table 2 and  
134 (33)). Prior to the antibody treatment, the chopped organs were enzymatically digested in  
135 RPMI medium containing collagenase IV (8 mg/ml for the bladder and 2 mg/ml for the  
136 kidney) and DNase I (1 µl) at RT for 90 min, 250 rpm shaking with frequent pipetting to  
137 mix. The cell suspension was passed through a 35 µm filter strainer (Falcon®) to remove  
138 leftover tissue pieces, and washed once in D-PBS(2000 rpm, 5 min, RT).

139 After treatment with RBC lysis buffer (RT, 10 min), the cells were centrifuged. Next, the cell  
140 pellets were stained (in tubes protected from light) with 1 µl live/dead marker (Alexa Fluor  
141 430 NHS Ester (Succinimidyl Ester), ThermoFisher) RT, 25 min, 2 µl of Fc block (surface  
142 staining, 4°C, 10 min), and then with an antibody cocktail (2µl/antibody, RT, 15 min).

143 Between the two staining steps, the cell pellets were washed once in FACS buffer (D-PBS +  
144 2%FBS). After the final staining step, the cells were resuspended in 250 µl fixation buffer  
145 (4°C, 20 min), washed once in FACS buffer, and resuspended in FACS buffer for use in  
146 flow-cytometry. The data were analyzed with FlowJO™ version 10. After gating on CD45<sup>+</sup>  
147 cells, we detected monocytes (MHCII-CD11b<sup>+</sup> Ly6G<sup>-</sup>), neutrophils (MHCII-CD11b<sup>+</sup> Ly6G<sup>+</sup>),  
148 eosinophils (MHCII-CD11b<sup>+</sup> SiglecF<sup>+</sup>Ly6G<sup>-</sup>), and mast cells (CD117<sup>+</sup>) (Fig S3).

### 149 **Histopathological examination of bladder and kidney**

150 WT and *Nlrp3*<sup>-/-</sup> mouse bladders and kidneys (from MRSA infected and control mice) were  
151 preserved in 10% formalin, embedded in paraffin, sectioned, and stained with hematoxylin



152 and eosin. A veterinary pathologist assessed sections of bladder and kidney microscopically  
153 in a blinded manner following previously determined semiquantitative scoring scheme to  
154 score the severity and extent of inflammation (34). For bladder sections, widespread  
155 inflammation, thrombosed vessels, and marked submucosal edema were assigned a score of  
156 3; mixed inflammation in mucosa and submucosa and around vessels, a score of 2; scattered  
157 neutrophils in submucosa and migrating through mucosa, a score of 1; while normal sections  
158 were assigned a score of 0. For kidney sections, many neutrophils in pelvic lumen and within  
159 the tissue were assigned a score of 3; clustered neutrophils in pelvic lumen; and inflammation  
160 within the epithelium and surrounding stroma, a score of 2; scattered neutrophils migrating  
161 though pelvic epithelium, a score of 1; while normal sections were assigned a score of 0.

## 162 **Statistical analysis**

163 Statistical tests were performed using Prism 9.4.1 ([www.graphpad.com](http://www.graphpad.com)). Data from multiple  
164 biological replicates with two or more technical replicates for each experiment were pooled  
165 together. Error bars in the figures represent standard deviation. Organ burden, cytokine  
166 amount, number of infiltrating immune cells, and histological scores between the WT and the  
167 *Nlrp3*<sup>-/-</sup> mice were compared using Mann-Whitney U statistic. Data were considered  
168 statistically significant if  $P \leq 0.05$ .

## 169 **Results**

### 170 **The kinetics of MRSA colonization in WT and *Nlrp3*<sup>-/-</sup> mice**

171 The ability of uropathogenic MRSA 1369 to infect the urinary tract and to disseminate to the  
172 spleen was compared in C57BL6 WT and *Nlrp3*<sup>-/-</sup> mouse models of ascending UTI by  
173 enumerating CFU burden in bladder, kidneys, and spleen at 6 (Fig 1A), 24 (Fig 1B), and 72  
174 (Fig 1C) hpi. At 6 hpi, we observed similar bacterial burden in the bladder and kidney tissues

175 from WT and *Nlrp3*<sup>-/-</sup> mice (Fig 1A). At 24 hpi, however, the *Nlrp3*<sup>-/-</sup> mice showed ~17-fold  
176 reduction in the median bladder CFUs (P= 0.22) and 8-fold reduction in the median kidney  
177 CFUs (P= 0.12) compared to the WT. At 72 hpi, compared to the WT the *Nlrp3*<sup>-/-</sup> mice  
178 showed ~6-fold reduction in median bladder CFU (P= 0.3) and ~9-fold reduction in median  
179 kidney CFUs (P= 0.31). Thus, compared to the WT, the *Nlrp3*<sup>-/-</sup> mice showed consistent but  
180 statistically insignificant reduction in the kidney and bladder CFU burdens at 24 or 72 hpi.  
181 We also observed modest reduction in the number of *Nlrp3*<sup>-/-</sup> mice showing MRSA  
182 dissemination to spleen compared to their WT counterparts. For example, we detected  
183 MRSA in the spleen homogenates of 1/6 *Nlrp3*<sup>-/-</sup> and 3/6 (50%) WT mice at 6 hpi, 0/18  
184 *Nlrp3*<sup>-/-</sup> and 3/14 (21%) WT mice at 24 hpi. MRSA CFUs were not detected in the spleen  
185 homogenates of either WT or *Nlrp3*<sup>-/-</sup> mice at 72 hpi.  
186 Furthermore, we observed similar median CFUs in the bladder, kidney, or spleen  
187 homogenates of female WT and *Nlrp3*<sup>-/-</sup> mice with MRSA CAUTI at 24 hpi (Fig S1A) as  
188 well as 72 hpi (Fig S1B). The median bacterial CFUs recovered from the silicone catheters  
189 implanted in the bladder at the time of infection were also similar between WT and *Nlrp3*<sup>-/-</sup>  
190 mice at 24 and 72 hpi (Fig S1).  
191 Next, we treated MRSA-infected WT mice with an NLRP3 inhibitor, MCC950 at 4 h after  
192 the induction of ascending UTI without catheter implants. At 24 hpi, we observed that the  
193 MCC950-treated mice had ~3-fold reduced median bladder bacterial burden (P=0.049)  
194 compared to DMSO vehicle-treated control mice (Fig 1D). The MCC950 treatment did not  
195 affect median kidney bacterial burden significantly (MCC950-treated median <LOD,  
196 DMSO-treated median= 40,500 CFU/ml, P=0.2), although it must be noted that we detected  
197 kidneys CFUs in fewer MCC950-treated versus DMSO-treated mice (3/8 versus 5/8, P= 0.6

198 by Fisher's exact test). The spleen CFUs were detected only in one MCC950-treated mouse  
199 (Fig 1D). The reduction in the MRSA burden in the MCC950-treated mouse bladder was not  
200 due to bacterial killing by MCC950 as confirmed by similar CFUs observed in MRSA 1369  
201 cultures in the presence of MCC950 or DMSO vehicle control (Supplementary Figure S2)  
202 Overall, these results indicate that the genetic ablation of NLRP3 is dispensable for MRSA  
203 UTI either with or without the catheter implant and that the pharmacological inhibition of  
204 NLRP3 inflammasome activity 4 hours after experimental induction of MRSA UTI modestly  
205 reduces bladder MRSA burden.

#### 206 **MRSA-induces similar levels of cytokine production in the WT and *Nlrp3*<sup>-/-</sup> mice**

207 Next, we assayed the effects of *Nlrp3* ablation on MRSA-induced production of  
208 pro-inflammatory cytokines (IL-1 $\beta$ , IL-6, IL-17A, and TNF- $\alpha$ ) and chemokines (CCL2,  
209 CCL3, CCL5, CXCL1, and CXCL2) and anti-inflammatory cytokine IL-10 at 24 hpi time  
210 point at which MRSA-infected bladder tissue show significant localized inflammation (12).  
211 MRSA infection induced production of IL-6, CXCL1, CCL2, and CCL3 in mouse bladders  
212 (Fig 2A) and IFN $\gamma$ , CXCL1, and IL-10 in mouse kidneys (Fig 2B). Although, compared to  
213 the WT, none of the cytokines was produced in significantly different amounts by MRSA-  
214 infected *Nlrp3*<sup>-/-</sup> mice either in the bladder (Fig 2A) or the kidney (Fig 2B) tissues.

#### 215 **The ablation of *Nlrp3* does not affect MRSA-induced immune cell infiltration in mouse** 216 **bladder and kidney tissues**

217 Next, we used flow cytometry to characterize the granulocytes and monocytes infiltrating the  
218 bladder and the kidneys of MRSA 1369-infected WT and *Nlrp3*<sup>-/-</sup> mice at 24 hpi. The  
219 fluorescent antibodies used to stain specific cell surface markers are presented in Table 1.  
220 The gating strategy to differentiate between different immune cells is presented in

221 supplementary figure S3. Among the CD45<sup>+</sup> cells, the dominant cell populations were  
222 neutrophils (MHCII<sup>-</sup>/CD11b<sup>+</sup>/Ly6G<sup>+</sup>), monocytes (MHCII<sup>-</sup>/CD11b<sup>+</sup>/Ly6G<sup>-</sup>), eosinophils  
223 (MHCII<sup>-</sup>/CD11b<sup>+</sup>/SiglecF<sup>+</sup>/Ly6G<sup>-</sup>), and mast cells (CD117<sup>+</sup>). While MRSA-infected *Nlrp3*<sup>-/-</sup>  
224 bladders showed higher number of monocytes, eosinophils, and mast cells compared to those  
225 in MRSA infected WT bladder tissues (Fig 3A, B), this increase was statistically significant  
226 only in the case of monocytes. Compared to their WT counterparts, MRSA-infected *Nlrp3*<sup>-/-</sup>  
227 kidneys showed statistically insignificant reduction in neutrophils population, while the  
228 monocytes, eosinophils, and mast cells populations were unaffected (Fig 3C, D).

### 229 **Histopathological examination of WT and *Nlrp3*<sup>-/-</sup> bladder and kidney sections**

230 In comparison to the PBS inoculated controls, MRSA-infected WT as well as *Nlrp3*<sup>-/-</sup> mice  
231 showed significantly higher presence of inflammatory cells in bladder (Fig 4 A) and kidney  
232 samples (Fig 4 C). Next, we scored these tissues for the signs of inflammation on a scale of  
233 1-3 and individual scores for each tissue were plotted. We observed that MRSA infection  
234 significantly increased the median inflammation scores in bladder (Fig 4B) and kidney (Fig  
235 4D) of both WT and *Nlrp3*<sup>-/-</sup> mice compared to PBS-inoculated controls. However, within  
236 MRSA-infected bladder or kidney tissues, the severity of inflammation between WT and  
237 *Nlrp3*<sup>-/-</sup> mice was similar.

### 238 **Discussion**

239 Various reports have established a crucial role for NLRP3 inflammasome in acute and  
240 chronic cystitis caused by uropathogenic *E. coli* (UPEC) (15-23). Whether NLRP3  
241 inflammasome is important in MRSA-UTI, however has not been deciphered. In this report,  
242 we sought to bridge this knowledge gap by comparing MRSA UTI between C57BL6 WT and  
243 *Nlrp3*<sup>-/-</sup> mice carrying a targeted mutation in *Nlrp3* gene (30). As a model organism, we used

244 uropathogenic MRSA 1369 that has been previously used in UTI research (12, 13). We have  
245 also reported that *in vitro* exposure to human urine induces MRSA 1369  $\alpha$ -hemolysin (13), a  
246 known activator of NLRP3 in myelocytes (25). We observed consistent but statistically  
247 insignificant reduction in the CFUs recovered from the bladder and kidneys of *Nlrp3*<sup>-/-</sup> mice  
248 compared to the WT at 24 and 72 h after the induction of ascending UTI. Moreover, the  
249 number of mice from *Nlrp3*<sup>-/-</sup> cohort with detectable MRSA burden in kidneys was also lower  
250 compared to the WT. In contrast to these results, in the mouse model of CAUTI, the median  
251 MRSA CFUs recovered from the bladder and the kidneys, the overall spread of the data  
252 around median, and the number of mice with detectable CFU burden were alike between the  
253 WT and *Nlrp3*<sup>-/-</sup> backgrounds at 24 and 72 hpi. Examining the MRSA infection in WT and  
254 *Nlrp3*<sup>-/-</sup> mouse models of CAUTI is clinically relevant because the use of indwelling urinary  
255 catheter is a known risk factor for MRSA-UTI (7). The administration of NLRP3 inhibitor  
256 MCC950, 4 hours after the induction of ascending UTI without catheter, resulted in a 3-fold,  
257 statistically significant reduction in the bladder CFUs at 24 hpi and a corresponding  
258 reduction in the kidney CFUs that was statistically non-significant. Compared to the DMSO-  
259 treated controls, fewer MCC950-treated mice showed kidney CFUs. MCC950 is a small  
260 molecular inhibitor of selectively inhibits the formation of NLRP3 inflammasome complex  
261 by binding the NLRP3 NACHT domain and blocking ATP hydrolysis (35, 36). In addition,  
262 the immune profiling of mice also revealed that NLRP3 activity does not affect either the  
263 cytokine production or immune cell infiltration in the MRSA infected bladder and kidney  
264 tissues. The histopathological examination of bladder and kidney sections also showed that  
265 MRSA 1369 induced inflammation was not significantly altered in *Nlrp3*<sup>-/-</sup> mice. Overall,  
266 these results argue that NLRP3 activity may be largely dispensable in MRSA-UTI. This is

267 different from UPEC experiments where NLRP3-deficient (*Nlrp3*<sup>-/-</sup> and *ASC*<sup>-/-</sup>) mice showed  
268 more severe acute cystitis marked by significantly higher UPEC burden, neutrophil influx,  
269 and inflammatory pathology in the infected mouse bladder (37).

270 The similar IL-1 $\beta$  levels in MRSA 1369-infected *Nlrp3*<sup>-/-</sup> and WT mice suggested that IL-1 $\beta$   
271 may be processed in an NLRP3 inflammasome independent manner similar to previous  
272 report that in neutrophils infected with UPEC strain CFT073, pro-IL1 $\beta$  to IL-1 $\beta$  processing  
273 was mediated by a cytoplasmic serine protease (20). It has been previously reported that  
274 MRSA 1369 infection exacerbates catheterization-induced localized inflammation at 24 hpi  
275 (12). The bladder and the kidneys from mice infected without catheter implant with MRSA  
276 strain SA116 also showed higher levels of pro-inflammatory cytokines, IL-1 $\beta$ , IL-6, and  
277 TNF $\alpha$  at 24 hpi (38). In contrast, we observed that MRSA 1369 mediates a modest increase  
278 in the levels of various pro-inflammatory cytokines and chemokines at 24 hpi. This  
279 difference may be attributed either to the presence of catheter implant (12), or to the potential  
280 differences between SA116 and MRSA 1369 (38).

281 Overall, our results argue a minor role, if any, for NLRP3 in shaping urinary immune  
282 defenses against acute MRSA UTI. Since we examined infection parameters in the WT and  
283 *Nlrp3*<sup>-/-</sup> mice up to 72 h after the induction of ascending UTI, future experiments focused on  
284 determining whether NLRP3 activity plays a role in the chronicity and life-threatening  
285 exacerbations of MRSA UTI are warranted.

286

## 287 **References**

- 288 1. Wagenlehner FM, Cek M, Naber KG, Kiyota H, Bjerklund-Johansen TE. 2012. Epidemiology,  
289 treatment and prevention of healthcare-associated urinary tract infections. *World J Urol*  
290 30:59-67.
- 291 2. Gaston JR, Johnson AO, Bair KL, White AN, Armbruster CE. 2021. Polymicrobial interactions  
292 in the urinary tract: is the enemy of my enemy my friend? *Infect Immun*  
293 doi:10.1128/IAI.00652-20.
- 294 3. Gajdacs M, Abrok M, Lazar A, Burian K. 2020. Increasing relevance of Gram-positive cocci in  
295 urinary tract infections: a 10-year analysis of their prevalence and resistance trends. *Sci Rep*  
296 10:17658.
- 297 4. Ackermann RJ, Monroe PW. 1996. Bacteremic urinary tract infection in older people. *J Am*  
298 *Geriatr Soc* 44:927-33.
- 299 5. Shrestha LB, Baral R, Khanal B. 2019. Comparative study of antimicrobial resistance and  
300 biofilm formation among Gram-positive uropathogens isolated from community-acquired  
301 urinary tract infections and catheter-associated urinary tract infections. *Infect Drug Resist*  
302 12:957-963.
- 303 6. Routh JC, Alt AL, Ashley RA, Kramer SA, Boyce TG. 2009. Increasing prevalence and  
304 associated risk factors for methicillin resistant *Staphylococcus aureus* bacteriuria. *J Urol*  
305 181:1694-8.
- 306 7. Looney AT, Redmond EJ, Davey NM, Daly PJ, Troy C, Carey BF, Cullen IM. 2017. Methicillin-  
307 resistant *Staphylococcus aureus* as a uropathogen in an Irish setting. *Medicine (Baltimore)*  
308 96:e4635.
- 309 8. Grillo S, Cuervo G, Carratala J, Grau I, Llaberia M, Aguado JM, Lopez-Cortes LE, Lalueza A,  
310 Sanjuan R, Sanchez-Batanero A, Ardanuy C, Garcia-Somoza D, Tebe C, Pujol M. 2020.  
311 Characteristics and Outcomes of *Staphylococcus aureus* Bloodstream Infection Originating  
312 From the Urinary Tract: A Multicenter Cohort Study. *Open Forum Infect Dis* 7:ofaa216.
- 313 9. Lafon T, Hernandez Padilla AC, Baisse A, Lavaud L, Goudelein M, Barraud O, Daix T, Francois B,  
314 Vignon P. 2019. Community-acquired *Staphylococcus aureus* bacteriuria: a warning  
315 microbiological marker for infective endocarditis? *BMC Infect Dis* 19:504.
- 316 10. Muder RR, Brennen C, Rihs JD, Wagener MM, Obman A, Stout JE, Yu VL. 2006. Isolation of  
317 *Staphylococcus aureus* from the urinary tract: association of isolation with symptomatic  
318 urinary tract infection and subsequent staphylococcal bacteremia. *Clin Infect Dis* 42:46-50.
- 319 11. Shigemura K, Tanaka K, Osawa K, Arakawa S, Miyake H, Fujisawa M. 2013. Clinical factors  
320 associated with shock in bacteremic UTI. *Int Urol Nephrol* 45:653-7.
- 321 12. Walker JN, Flores-Mireles AL, Pinkner CL, Schreiber HL, Joens MS, Park AM, Potretzke AM,  
322 Bauman TM, Pinkner JS, Fitzpatrick JAJ, Desai A, Caparon MG, Hultgren SJ. 2017.  
323 Catheterization alters bladder ecology to potentiate *Staphylococcus aureus* infection of the  
324 urinary tract. *Proceedings of the National Academy of Sciences of the United States of*  
325 *America* 114:E8721-E8730.



- 326 13. Paudel S, Bagale K, Patel S, Kooyers NJ, Kulkarni R. 2021. Human Urine Alters Methicillin-  
327 Resistant *Staphylococcus aureus* Virulence and Transcriptome. *Appl Environ Microbiol*  
328 87:e0074421.
- 329 14. Bortolotti P, Faure E, Kipnis E. 2018. Inflammasomes in tissue damages and immune  
330 disorders after trauma. *Frontiers in Immunology* 9:1-17.
- 331 15. Nagamatsu K, Hannan TJ, Guest RL, Kostakioti M, Hadjifrangiskou M, Binkley J, Dodson K,  
332 Raivio TL, Hultgren SJ. 2015. Dysregulation of *Escherichia coli* alpha-hemolysin expression  
333 alters the course of acute and persistent urinary tract infection. *Proc Natl Acad Sci U S A*  
334 112:E871-80.
- 335 16. Schaale K, Peters KM, Murthy AM, Fritzsche AK, Phan MD, Totsika M, Robertson AA, Nichols  
336 KB, Cooper MA, Stacey KJ, Ulett GC, Schroder K, Schembri MA, Sweet MJ. 2015. Strain- and  
337 host species-specific inflammasome activation, IL-1beta release, and cell death in  
338 macrophages infected with uropathogenic *Escherichia coli*. *Mucosal Immunol*  
339 doi:10.1038/mi.2015.44.
- 340 17. Symington JW, Wang C, Twentyman J, Owusu-Boaitey N, Schwendener R, Nunez G, Schilling  
341 JD, Mysorekar IU. 2015. ATG16L1 deficiency in macrophages drives clearance of  
342 uropathogenic *E. coli* in an IL-1beta-dependent manner. *Mucosal Immunol*  
343 doi:10.1038/mi.2015.7.
- 344 18. Demirel I, Persson A, Brauner A, Sarndahl E, Kruse R, Persson K. 2018. Activation of the  
345 NLRP3 Inflammasome Pathway by Uropathogenic *Escherichia coli* Is Virulence Factor-  
346 Dependent and Influences Colonization of Bladder Epithelial Cells. *Front Cell Infect Microbiol*  
347 8:81.
- 348 19. Schaale K, Peters KM, Murthy AM, Fritzsche AK, Phan MD, Totsika M, Robertson AA, Nichols  
349 KB, Cooper MA, Stacey KJ, Ulett GC, Schroder K, Schembri MA, Sweet MJ. 2016. Strain- and  
350 host species-specific inflammasome activation, IL-1beta release, and cell death in  
351 macrophages infected with uropathogenic *Escherichia coli*. *Mucosal Immunol* 9:124-36.
- 352 20. Demirel I, Persson A, Brauner A, Sarndahl E, Kruse R, Persson K. 2020. Activation of NLRP3  
353 by uropathogenic *Escherichia coli* is associated with IL-1beta release and regulation of  
354 antimicrobial properties in human neutrophils. *Sci Rep* 10:21837.
- 355 21. Kumawat AK, Paramel GV, Demirel KJ, Demirel I. 2021. Human Renal Fibroblasts, but Not  
356 Renal Epithelial Cells, Induce IL-1beta Release during a Uropathogenic *Escherichia coli*  
357 Infection In Vitro. *Cells* 10.
- 358 22. Ambite I, Puthia M, Nagy K, Cafaro C, Nadeem A, Butler DS, Rydstrom G, Filenko NA, Wullt B,  
359 Miethke T, Svanborg C. 2016. Molecular Basis of Acute Cystitis Reveals Susceptibility Genes  
360 and Immunotherapeutic Targets. *PLoS Pathog* 12:e1005848.
- 361 23. Schwartz DJ, Conover MS, Hannan TJ, Hultgren SJ. 2015. Uropathogenic *Escherichia coli*  
362 superinfection enhances the severity of mouse bladder infection. *PLoS Pathog* 11:e1004599.
- 363 24. Cohen TS, Boland ML, Boland BB, Takahashi V, Tovchigrechko A, Lee Y, Wilde AD, Mazaitis  
364 MJ, Jones-Nelson O, Tkaczyk C, Raja R, Stover CK, Sellman BR. 2018. *S. aureus* Evades  
365 Macrophage Killing through NLRP3-Dependent Effects on Mitochondrial Trafficking. *Cell*  
366 reports 22:2431-2441.



- 367 25. Craven RR, Gao X, Allen IC, Gris D, Wardenburg JB, McElvania-TeKippe E, Ting JP, Duncan JA.  
368 2009. Staphylococcus aureus  $\alpha$ -Hemolysin Activates the NLRP3-Inflammasome in Human  
369 and Mouse Monocytic Cells. PLoS ONE 4.
- 370 26. Holzinger D, Geldon L, Mysore V, Nippe N, Taxman DJ, Duncan JA, Broglie PM, Marketon K,  
371 Austermann J, Vogl T, Foell D, Niemann S, Peters G, Roth J. 2012. Staphylococcus aureus  
372 Panton-Valentine leukocidin induces an inflammatory response in human phagocytes via the  
373 NLRP3 inflammasome. 92:1069-1081.
- 374 27. Melehani JH, James DBA, DuMont AL, Torres VJ, Duncan JA. 2015. Staphylococcus aureus  
375 Leukocidin A/B (LukAB) Kills Human Monocytes via Host NLRP3 and ASC when Extracellular,  
376 but Not Intracellular. PLoS Pathogens 11.
- 377 28. Maher BM, Mulcahy ME, Murphy AG, Wilk M, O'Keeffe KM, Geoghegan JA, Lavelle EC,  
378 McLoughlin RM. 2013. Nlrp-3-Driven Interleukin 17 Production by  $\gamma\delta$ T Cells Controls  
379 Infection Outcomes during Staphylococcus aureus Surgical Site Infection. Infection and  
380 Immunity 81:4478-4478.
- 381 29. Hanamsagar R, Aldrich A, Kielian T. 2014. Critical role for the AIM2 inflammasome during  
382 acute CNS bacterial infection. J Neurochem 129:704-11.
- 383 30. Kovarova M, Hesker PR, Jania L, Nguyen M, Snouwaert JN, Xiang Z, Lommatzsch SE, Huang  
384 MT, Ting JP, Koller BH. 2012. NLRP1-dependent pyroptosis leads to acute lung injury and  
385 morbidity in mice. J Immunol 189:2006-16.
- 386 31. Miyoshi J, Leone V, Nobutani K, Musch MW, Martinez-Guryn K, Wang Y, Miyoshi S, Bobe  
387 AM, Eren AM, Chang EB. 2018. Minimizing confounders and increasing data quality in  
388 murine models for studies of the gut microbiome. PeerJ 6:e5166.
- 389 32. Hung CS, Dodson KW, Hultgren SJ. 2009. A murine model of urinary tract infection. Nature  
390 protocols 4:1230-1243.
- 391 33. Ingersoll MA, Kline KA, Nielsen HV, Hultgren SJ. 2008. G-CSF induction early in  
392 uropathogenic Escherichia coli infection of the urinary tract modulates host immunity.  
393 Cellular microbiology 10:2568-2578.
- 394 34. Armbruster CE, Smith SN, Johnson AO, DeOrnellas V, Eaton KA, Yep A, Mody L, Wu W,  
395 Mobley HLT. 2017. The pathogenic potential of Proteus mirabilis is enhanced by other  
396 uropathogens during polymicrobial urinary tract infection. Infection and Immunity 85.
- 397 35. Coll RC, Hill JR, Day CJ, Zamoshnikova A, Boucher D, Massey NL, Chitty JL, Fraser JA, Jennings  
398 MP, Robertson AAB, Schroder K. 2019. MCC950 directly targets the NLRP3 ATP-hydrolysis  
399 motif for inflammasome inhibition. Nature Chemical Biology 2019 15:6 15:556-559.
- 400 36. Coll RC, Robertson AAB, Chae JJ, Higgins SC, Muñoz-Planillo R, Inserra MC, Vetter I, Dungan  
401 LS, Monks BG, Stutz A, Croker DE, Butler MS, Haneklaus M, Sutton CE, Núñez G, Latz E,  
402 Kastner DL, Mills KHG, Masters SL, Schroder K, Cooper MA, O'Neill LAJ. 2015. A small  
403 molecule inhibitor of the NLRP3 inflammasome is a potential therapeutic for inflammatory  
404 diseases. Nature medicine 21:248-248.
- 405 37. Ambite I, Puthia M, Nagy K, Cafaro C, Nadeem A, Butler DSC, Rydström G, Filenko NA, Wullt  
406 B, Miethke T, Svanborg C. 2016. Molecular Basis of Acute Cystitis Reveals Susceptibility  
407 Genes and Immunotherapeutic Targets. PLoS Pathogens 12:e1005848-e1005848.

- 408 38. Saenkham-Huntsinger P, Hyre AN, Hanson BS, Donati GL, Adams LG, Ryan C, Londono A,  
409 Moustafa AM, Planet PJ, Subashchandrabose S. 2021. Copper Resistance Promotes Fitness  
410 of Methicillin-Resistant *Staphylococcus aureus* during Urinary Tract Infection. *mBio*  
411 12:e0203821.  
412

413 **Table 1: List of antibodies used for flowcytometry**

| Antibodies       | Conjugate       | Clone       |
|------------------|-----------------|-------------|
| CD64             | BV 786          | X54-5/7.1   |
| SiglecF          | BV711           | M290        |
| CD3              | BV650           | 145-2C11    |
| CD45             | BV605           | 30-F11      |
| Live/Dead        | Alexa fluor 430 |             |
| Fc epsilon RI    | Pac Blue        | MAR1        |
| Ly6C             | PE-Cy7          | HK1.4       |
| CD11c            | PerCp-Cy5.5     | N418        |
| CD103            | PE-CF594        | M290        |
| c-kit (CD117)    | PE              | 2B8         |
| CD11b            | FITC            | M1/70       |
| MHC-II (I-A/I-E) | APC-Fire750     | M5/114.15.2 |
| F4/80            | Alexa Fluor 700 | CI:A3-1     |

414

415

416 **Figure Legend:**

417 **Figure 1: MRSA UTI in WT and *Nlrp3*<sup>-/-</sup> mice.** Female WT (control) and *Nlrp3*<sup>-/-</sup> mice  
418 were inoculated transurethrally with 5 X 10<sup>7</sup> CFU of uropathogenic MRSA strain, MRSA  
419 1369. Mice were sacrificed and the bacterial burden in the bladder, the kidneys, and the  
420 spleen was determined at 6 hpi (A), 24 hpi (B), and 72 hpi (C). In separate experiments, WT  
421 C57BL6 mice infected with MRSA1369 were injected 4hpi intraperitoneally with either  
422 10mg/kg MCC950 or DMSO vehicle. MRSA CFUs in the bladder, the kidneys and the  
423 spleen were determined at 24hpi (D). Scatter plots show CFU counts from a single mouse  
424 (n= 6 to 18/ group) with the median as the central tendency; the dotted lines show the limit of  
425 detection. Statistical significance was determined by Mann-Whitney U test. For all figures,  
426 P≤0.05 was considered significant and indicated by \*.

427 **Figure 2: Cytokine profiling of MRSA-infected WT and *Nlrp3*<sup>-/-</sup> mouse urinary tracts.**

428 MRSA 1369-infected female WT (control) and *Nlrp3*<sup>-/-</sup> mice were sacrificed at 24 hpi.  
429 Cytokines and chemokines (IL-1β, IL-6, IL-10, IL-17A, TNF-α, CXCL1 (KC), CCL2 (MCP-  
430 1), CCL3 (MIP1α), IFN-γ, CCL5 (RANTES) produced in bladder (A) and kidneys (B) were  
431 quantified by Multiplex-ELISA. The data were compared using Mann-Whitney U test.

432 **Figure 3: Immune cell infiltration to MRSA-infected WT and *Nlrp3*<sup>-/-</sup> mouse urinary**

433 **tracts.** The bladder (A, B) and kidney (C, D) homogenates from WT and *Nlrp3*<sup>-/-</sup> mice  
434 infected with MRSA 1369 for 24 h were analyzed by flow cytometry using the gating  
435 strategy for CD45<sup>+</sup> lymphocytes provided in Fig S3. Specific lymphocyte types are shown as  
436 the total number of cells (A, C) and the percentage of CD45<sup>+</sup> lymphocytes (B, D). Statistical  
437 significance was determined by Mann-Whitney U test.

438 **Figure 4: Histopathological examination of MRSA-infected WT and Nlrp3<sup>-/-</sup> bladder**  
439 **and kidney sections.** Bladder (A) and kidney (C) sections from control (PBS) and MRSA-  
440 infected WT and Nlrp3<sup>-/-</sup> mice were stained with hematoxylin-eosin to visualize  
441 inflammatory cells (shown by an arrow). The tissue sections were scored in a blinded manner  
442 using the specific criteria listed in the material and methods. The inflammation scores for  
443 individual bladder (B) and kidney (D) samples were presented as a scatter plot with median  
444 as the central tendency. Statistical significance was determined by Mann-Whitney U test.



Fig-2

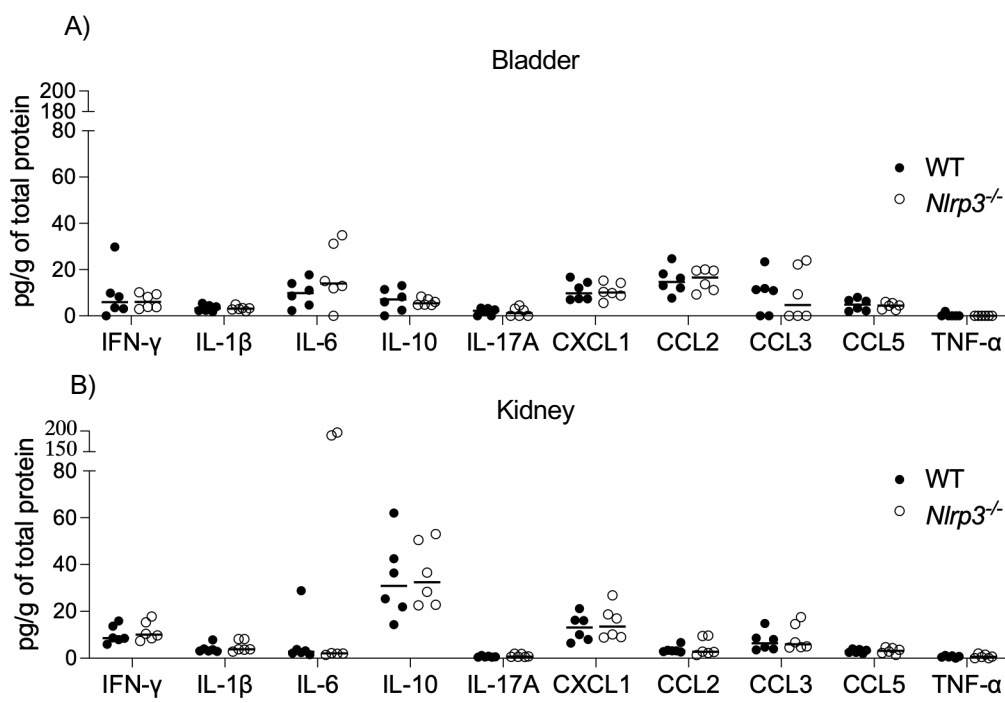

Fig-3

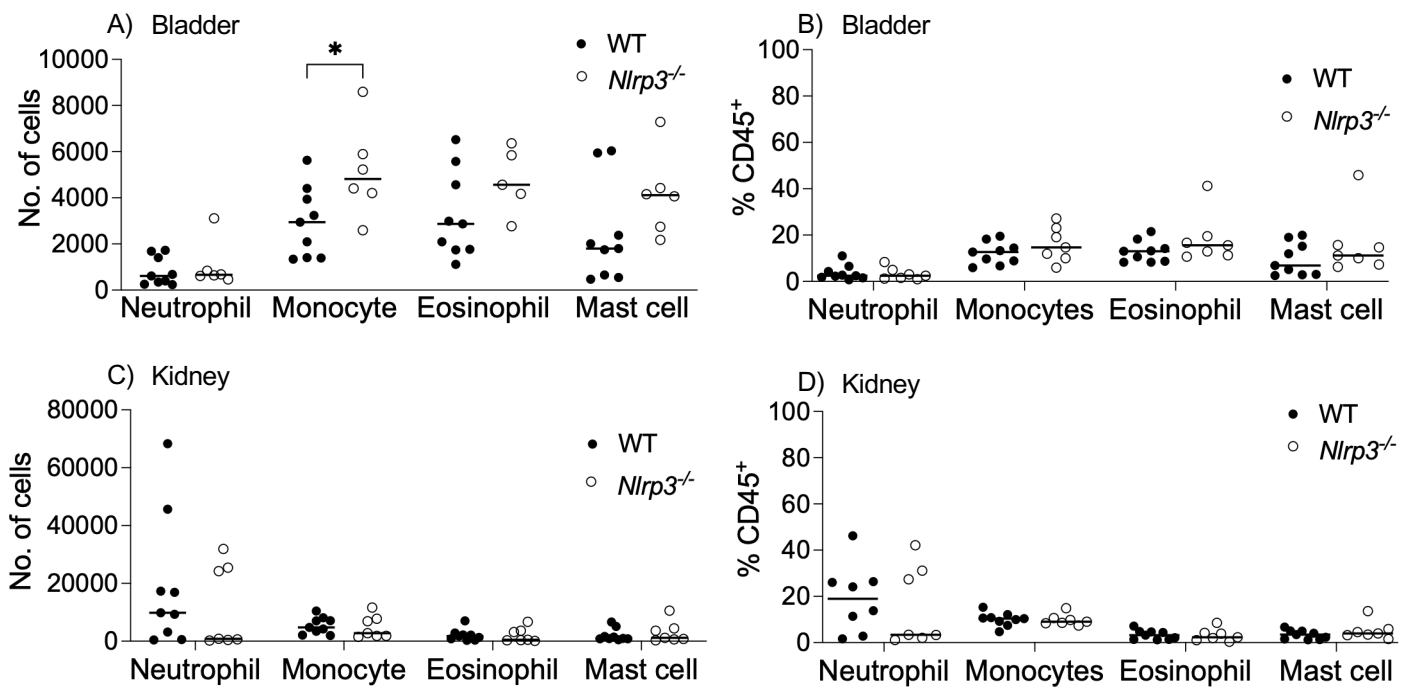



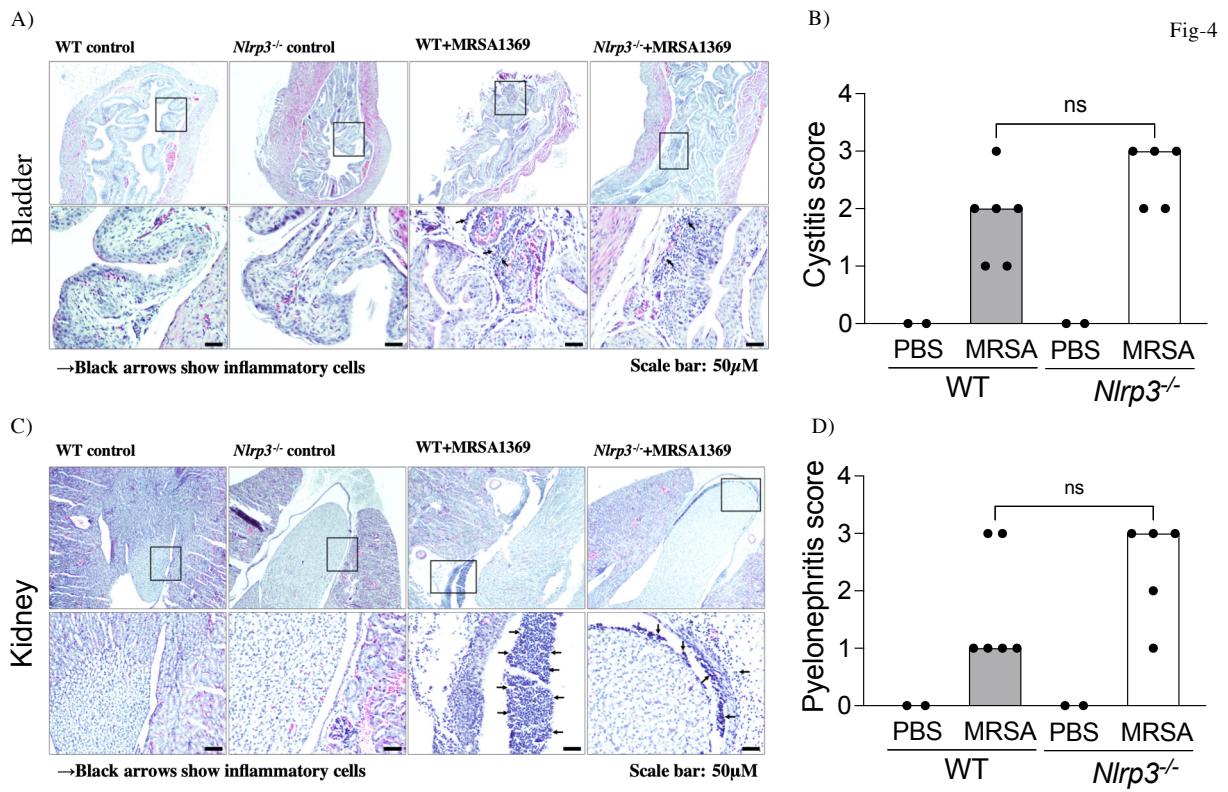

Source: https://www.biorxiv.org/content/10.1101/2022.11.11.516235v1.full.pdf
